# Supplementary material for: Sustainability content knowledge for teachers in accounting and controlling: a systematic literature review on industry approaches, practices and desired competences
Source: Frontiers journal article supplement (doi:10.3389/feduc.2025.1519350), 2025-05-27
Supplement: Table_1.docx [file Table_1.docx]

**Appendix A. List of coded publications**

| Author | Year | Title | Journal/Publisher |
| --- | --- | --- | --- |
| Altenburger, Reinhard | 2022 | Strategisches CSR-Controlling in Familienunternehmen | Springer Nature |
| Anderson, Kai; Sommer, Carina; Fassino, Gina | 2022 | Kann HR Nachhaltigkeit? | Personalmagazin |
| Aras, Güler; Crowther, David | 2009 | Corporate Sustainability Reporting: A Study in Disingenuity? | Journal of Business Ethics |
| Arora, Mitali Panchal; Lodhia, Sumit; Stone, Gerard | 2022 | Enablers and barriers to the involvement of accountants in integrated reporting | Mediterranean Accountancy Research |
| Asenkerschbaumer, Stefan; Watterott, Richard | 2011 | Controlling-Steuerungsimpulse für ein Mehr an Nachhaltigkeit am Beispiel Bosch | Controlling |
| Bernatzky, Simone; Endenich, Christoph; Wömpener, Andreas | 2018 | Zur Integration von Nachhaltigkeit in das Controlling - Eine empirische Analyse | Betriebswirtschaftliche Forschung und Praxis |
| Biel, Alfred | 2020 | Nachhaltigkeit ein Controlling-Thema? | CONTROLLER Magazin |
| Biswas, Sharlene; O’Grady, Winnie | 2016 | Using external environmental reporting to embed sustainability into organisational practices | Accounting Research Journal |
| Bogicevic, Jasmina; Domanovic, Violeta; Krstic, Bojan | 2016 | The role of financial and non-financial performance indicators in enterprise sustainability evaluation | Ekonomika |
| Braun, Sabine | 2019 | Nachhaltigkeitsberichterstattung: Im Spannungsfeld unterschiedlicher Anforderungen und Interessen | Ökologisches Wirtschaften |
| Burritt, Roger; Schaltegger, Stefan | 2001 | Eco‐efficiency in corporate budgeting | Environmental Management and Health |
| Clarke, Kevin; O’Neill, Sharron | 2005 | Is the Environmental Professional … an Accountant? | Greener Management International |
| D’Amato, Alessia; Roome, Nigel; Lenssen, G. | 2009 | Toward an integrated model of leadership for corporate responsibility and sustainable development: a process model of corporate responsibility beyond management innovation | Corporate Governance: The International Journal of Effective Board Performance |
| Dumitru, Mădălina; JINGA, Gabriel | 2015 | Integrated Reporting Practice for Sustainable Business: A Case Study | Audit Financiar |
| Endenich, Christoph; Trapp, Rouven | 2022 | Nachhaltigkeitscontrolling in Klein- und Mittelunternehmen | Springer Nature |
| Faupel, Christian; Stremmel, Florian | 2011 | Berücksichtigung von Nachhaltigkeit im Rahmen einer wertorientierten Unternehmensführung | Controlling & Management |
| Ferreira, Aldónio; Moulang, Carly; Hendro, Bayu | 2010 | Environmental management accounting and innovation: an exploratory analysis | Accounting, Auditing & Accountability Journal |
| Figge, Frank; Hahn, Tobias | 2004 | Sustainable Value Added—measuring corporate contributions to sustainability beyond eco-efficiency | Ecological Economics |
| Figge, Frank; Hahn, Tobias; Schaltegger, Stefan; Wagner, Marcus | 2002 | The Sustainability Balanced Scorecard - linking sustainability management to business strategy | Business Strategy and the Environment |
| Fischer, Stephan; Schmitz, Anja; Knepel, Kirke | 2014 | Auswahl von nachhaltig handelnden Mitarbeitern - vom Kompetenzmodell zur Auswahlmethode | Wirtschaftspsychologie |
| Fischer, Thomas M.; Huber, Robert; Sawczyn, Angelika | 2010 | Nachhaltige Unternehmensführung als Herausforderung für das Controlling. | Controlling |
| Gaggl, Philipp | 2021 | Nachhaltigkeitscontrolling: Wie nichtfinanzielle Informationen zum Werttreiber werden | Springer Gabler |
| Gänßlen, Siegfried; Kraus, Udo; Ette, Daniel | 2011 | Green Controlling - Green Profit - Nachhaltigkeitscontrolling bei Hansgrohe | Controlling |
| Gawenko, Wladislav; Richter, Fanny; Hinz, Michael; Götze, Uwe | 2020 | Interne Ansätze zur Nachhaltigkeitsbewertung in der externen Berichterstattung. Konzeptionelle und empirische Analyse der DAX-Unternehmen | Die Unternehmung |
| Gebauer, Jana | 2013 | Die Zukunft der Nachhaltigkeitsberichterstattung III und IV/IV: Glaubwürdigkeit können nur die Unternehmen selbst herstellen | Ökologisches Wirtschaften |
| Glanze, Eva | 2022 | Kompass für Green Change | OrganisationsEntwicklung |
| Greiling, Dorothea; Slacik, Johannes | 2022 | Nachhaltigkeitsberichterstattung von Elektrizitätsversorgungsunternehmen: Ein internationaler Vergleich | Springer Nature |
| Greiling, Dorothea; Ther, Daniela | 2010 | Leistungsfähigkeit des Sustainable Value-Ansatzes als Instrument des Sustainability Controlling | Springer |
| Günther, Edeltraud; Stechemesser, Kristin | 2011 | Instrumente des Green Controllings: ein Blick zurück, ein Blick nach vorn | Controlling |
| Günther, Thomas | 2014 | Planungs- und Kontrollinstrumente zur unternehmenswertorientierten Führung in mittelständischen Unternehmen | Controlling |
| Hartmann, Frank; Maas, Karen; Perego, Paolo | 2016 | Den Wald vor lauter Bäumen nicht sehen: Controller auf der Suche nach Nachhaltigkeit | Springer Gabler |
| Heimel, Jana; Momberg, Martin | 2021 | Sustainable Finance: Nachhaltigkeitscontrolling zur Steuerung des sozialen und ökologischen Wirtschaftens von Unternehmen | Springer Gabler |
| Hoekstra, Rutger | 2020 | SNA and beyond: Towards a Broader Accounting Framework That Links the SNA, SDGs and Other Global Initiatives | Statistical Journal of the IAOS |
| Horváth, Péter; Pütter, Judith M.; Dagilienė, Lina; Dimante, Dzineta; Haldma, Toomas; Kochalski, Cezary; Král, Bohumil; Labaš, Davor; Lääts, Kertu; Bedenik, Nidžara Osmanagić; Pakšiová, Renáta; Petera, Petr; Ratajczak, Piotr; Buhovac, Adriana Rejc; Sava, Adriana; Sucală, Voicu-Ion; Tirnitz, Tamás József; Wagner, Jaroslav | 2017 | Status Quo and Future Development of Sustainability Reporting in Central and Eastern Europe | Journal for East European Management Studies |
| Hubbard, Graham | 2009 | Measuring organizational performance: beyond the triple bottom line | Business Strategy and the Environment |
| Isensee, Johannes; Michel, Uwe | 2011 | Green Controlling - Die Rolle des Controllers und aktuelle Entwicklungen in der Praxis | Controlling |
| Kämmler-Burrak, Andrea; Bauer, Rainer | 2022 | Nachhaltigkeit wird Standardaufgabe im Controlling | CONTROLLER Magazin |
| Klute-Wenig, Sandra; Refflinghaus, Robert | 2015 | Integrating sustainability aspects into an integrated management system | TQM Journal |
| Krause, Hans-Ulrich | 2016 | Controlling-Kennzahlen für ein nachhaltiges Management: Ein umfassendes Kompendium kompakt erklärter Key Performance Indicators | DeGruyter |
| Krivačić, Dubravka; Janković, Sandra | 2021 | Sustainability reporting during the pandemic: current state and expectations for the future | Journal of Accounting & Management |
| Kuttner, Michael | 2022 | Corporate Social Responsibility-Controlling: Eine instrumentelle Perspektive | Springer Nature |
| Lühn, Michael; Nuzum, Anne-Katrin; Petersen, Holger; Schaltegger, Stefan | 2022 | Controller und Nachhaltigkeit im Kontext neuer Berichterstattungspflichten | Rethinking Finance |
| Lux, Wilfried; Olbert-Bock, Sibylle | 2016 | Strategisches Controlling als Teil des Sustainability Performance Managements - auch für KMU | CONTROLLER Magazin |
| Michel, Uwe; Isensee, Johannes; Stehle, Alexander | 2014 | Sustainability Controlling: Planung, Steuerung und Kontrolle der Realisierung der Nachhaltigkeitsstrategie | Springer |
| Mödritscher, Gernot; Wall, Friederike | 2021 | Nachhaltiger Konsum und seine Verankerung im Controlling | Springer |
| Muller, Roger; Veser, Mark | 2020 | The Current State of Nonfinancial Reporting in Switzerland and Beyond | Internal Approaches for Sustainability Assessment in the External Reporting -- A Conceptual and Empirical Analysis of DAX-Companies |
| Nikolic, Gordana; Vitenberg, Valentina; Karanovic, Bisera | 2020 | Adoption of Sustainable Accounting Practices Among Croatian SME’s | Economies of the Balkan and Eastern European Countries |
| Noodt, Andreas; Grede, Jessica | 2013 | Die Welt ändert sich - die Rechnungslegung auch | Der Betrieb |
| Olbert-Bock, Sibylle; Bussmann, Christian; Lux, Wilfried; Garrels, Sven | 2015 | Nachhaltigkeitsmanagement erfolgreich im Unternehmen professionalisieren | IM+io Fachmagazin |
| Pandit, Ganesh M.; Rubenfield, Allen J. | 2016 | The Current State of Sustainability Reporting by Smaller S&P 500 Companies | CPA Journal |
| Prammer, Heinz Karl | 2010 | Wie lässt sich die operative Umweltleistung von Unternehmen messen? – Streiflichter auf ausgewählte Konzepte und Normen | Gabler |
| Preiß, Marlene | 2019 | Methoden zur Steigerung der Ressourceneffizienz und ihr Einsatz im Unternehmen | Hampp |
| Raschke, Christian | 2021 | Das F in CFO steht für Future | Creditreform |
| Rodriguez-Olalla, Ana; Aviles-Palacios, Carmen | 2017 | Integrating sustainability in organisations: an activity-based sustainability model | Sustainability |
| Rönz, Malte; Ryba, Michael | 2012 | Kennzahlen in Nachhaltigkeitsberichten | CONTROLLER Magazin |
| Schäfer, Henry; Kröner, Fabian; Seeberg, Barbara | 2011 | Zielgruppengerechte Nachhaltigkeitsberichterstattung mit Hilfe des Socially Responsible Investment (SRI)-Factsheets | Controlling |
| Schäffer, Utz | 2022 | Nachhaltigkeit und Controlling: Ein Aufruf zum Handeln | CONTROLLER Magazin |
| Schäffer, Utz; Weber, Jürgen | 2015 | Controlling im Wandel: Die Veränderung eines Berufsbilds im Spiegel der 2. WHU-Zukunftsstudie | Controlling |
| Schaltegger, Stefan | 2020 | Nachhaltigkeit als Treiber des Unternehmenserfolgs | Rethinking Finance |
| Schaltegger, Stefan; Zvezdov, Dimitar | 2011 | Konzeption und Praxis des Nachhaltigkeitscontrollings | Controlling |
| Schier, Michael; Bonnländer, Anton | 2018 | Nachhaltigkeit als Teil der Geschäftsstrategie | Die Bank |
| Schmidpeter, René; Günther, Edeltraud | 2013 | CSR — Innovationen im Rechnungswesen | Controlling & Management Review |
| Schmitz, Hans | 2021 | GRI-Nachhaltigkeitskennzahlen für das Controlling im Mittelstand | CONTROLLER Magazin |
| Schneider, Georg; Müllner, Thomas | 2021 | CSR-Berichterstattung in Europa - Quo vadis? | Der Konzern |
| Schubert, René; Gerhardt, Nadine | 2021 | Praxisanforderungen mittelständischer Unternehmen an Controlling-Nachwuchskräfte | CONTROLLER Magazin |
| Schulz, Thomas | 2014 | CFO-Agenda: Gute Gründe, Nachhaltigkeit auf die Tagesordnung zu setzen | Springer |
| Schulze, Mike; Thomas, Silke | 2012 | Strategisches Nachhaltigkeits-Controlling bei der Deutschen Telekom AG Corporate Responsibility Key Performance-Indikatoren von Mike Schulze und Silke Thomas | CONTROLLER Magazin |
| Schwarzmaier, Ulrich | 2013 | Entwicklungstendenzen des Controllings unter besonderer Berücksichtigung der Veränderungen durch die Nachhaltigkeitsdiskussion | CONTROLLER Magazin |
| Schwarzmaier, Ulrich | 2015 | Die Rolle des Controllings im Sustainable Management | Der Betriebswirt |
| Sneidere, Ruta; Bumane, Inga | 2019 | The challenges for the profession of accountant in the changing global economic environment | University of Latvia |
| Stehle, Alexander; Stelkens, Vera | 2018 | Green Controlling - eine Aufgabe für Controller und Nachhaltigkeitsexperten! | CONTROLLER Magazin |
| Sulaiman, Maliah; Mokhtar, Norsyahida | 2012 | Ensuring Sustainability: A Preliminary Study of Environmental Management Accounting in Malaysia | International Journal of Business & Management Science |
| Vuković, Renata; Vukić, Nikolina Markota; Sesar, Darija | 2020 | Non-Financial Reporting as Part of Sustainability Accounting. With the Examples of Good Practices. | Journal of Accounting & Management |
| Walinska, Ewa; Dobroszek, Justyna | 2021 | The Functional Controller for Sustainable and Value Chain Management: Fashion or Need? A Sample of Job Advertisements in the COVID-19 Period | Sustainability |
| Weber, Jürgen; Georg, Johannes; Janke, Robert | 2010 | Nachhaltigkeit: Relevant für das Controlling? | Controlling & Management |
| Weber, Jürgen; Schäffer, Utz | 2016 | Nachhaltigkeit - Modewelle oder ein neues Arbeitsfeld für Controller? | Springer |
| Weigand, Heiner | 2020 | Green Marketing - nachhaltig erfolgreich | Haufe |
| Wellbrock, Wanja; Ludin, Daniela; Krauter, Sina | 2020 | Nachhaltigkeitscontrolling: Instrumente und Kennzahlen für die strategische und operative Unternehmensführung | Springer |
| Wördenweber, Martin | 2017 | Nachhaltigkeitsmanagement | Schäffer-Poeschel |
